# Supplementary material
Source: PubMed Central journal article supplement (PMC6683639)
Supplement: Supplemental_Material.pdf [file Supplemental_Material.pdf]

| Author        | Publication  | Year | Country        | Design        | Mono/Multicenter | NOS | Number of Patients |
|---------------|--------------|------|----------------|---------------|------------------|-----|--------------------|
| Hartery       | Full text    | 2016 | Ireland        | Retrospective | Mono             | 5   | 5                  |
| Lim           | Full text    | 2016 | UK             | Retrospective | Mono             | 5   | 5                  |
| Wright        | Full text    | 2017 | US             | Retrospective | Mono             | 6   | 10                 |
| Olmedo-Martin | Full text    | 2017 | Spain          | Retrospective | Mono             | 4   | 2                  |
| Mumtaz        | Case Reports | 2016 | UK             | Retrospective | Mono             | 4   | 1                  |
| Peverelle     | Abstract     | 2018 | Australia      | Retrospective | Mono             | 4   | 5                  |
| Drastich      | Abstract     | 2018 | Czech Republic | Retrospective | Mono             | 3   | 2                  |
| Daffra        | Abstract     | 2017 | Argentina      | Retrospective | Mono             | 3   | 1                  |

**Supplementary table 1.** Studies characteristics.

| Reference          | Mean Age (years) | Male | UC | CD | Time between LT and VDZ start (mean months) | Time between LT and VDZ start (range months) | Previous anti-TNF agents (n) | Previous infections (n) |
|--------------------|------------------|------|----|----|---------------------------------------------|----------------------------------------------|------------------------------|-------------------------|
| Hartery 2016       | NA               | 4    | 4  | 1  | 69.16                                       | 38.4 - 117.6                                 | 2                            | 0                       |
| Lim 2016           | 42.4             | 4    | 5  | 0  | 73.9                                        | 10.8 - 159.6                                 | 4                            | 0                       |
| Wright 2017        | 44.0             | 8    | 8  | 2  | 57.2                                        | 0 - 186                                      | 4                            | NA                      |
| Olmedo-Martin 2017 | 36.0             | 0    | 2  | 0  | 46.5                                        | 35 - 58                                      | 2                            | 2                       |
| Mumtaz 2016        | 22.0             | 0    | 1  | 0  | NA                                          | NA                                           | 0                            | 1                       |
| Peverelle 2018     | NA               | 4    | 4  | 1  | NA                                          | NA                                           | NA                           | NA                      |
| Drastich 2018      | 32.0             | 2    | 2  | 0  | NA                                          | NA                                           | 2                            | 2                       |
| Daffra 2017        | 20.0             | 1    | 1  | 0  | 42.0                                        | NA                                           | 1                            | 0                       |

**Supplementary table 2. Baseline characteristics.** UC: ulcerative colitis; CD Crohn's Disease; VDZ: Vedolizumab; LT: Liver transplantation; TNF: tumor necrosis factor; n: number of patients.

| Reference          | Clinical response (n) | Clinical remission (n) | Mucosal healing (n) | No response (n) | Colectomy (n) |
|--------------------|-----------------------|------------------------|---------------------|-----------------|---------------|
| Hartery 2016       | 3                     | 2                      | 2                   | 2               | 2             |
| Lim 2016           | \                     | \                      | \                   | \               | \             |
| Wright 2017        | 6                     | \                      | \                   | 4               | 2             |
| Olmedo-Martin 2017 | 2                     | 2                      | 2                   | 0               | 0             |
| Mumtaz 2016        | 1                     | 1                      | 1                   | 0               | 0             |
| Peverelle 2018     | 5                     | 5                      | 5                   | 0               | 0             |
| Drastich 2018      | 2                     | 2                      | 2                   | 0               | 0             |
| Daffra 2017        | 1                     | 1                      | 1                   | 0               | 0             |

**Supplementary table 3.** Inflammatory Bowel Disease treatment outcomes; n: number of patients.
